# Supplementary material for: Fluorescent probe for Fe3+ and CN− in aqueous media mimicking a memorized molecular crossword puzzle
Source: Royal Society of Chemistry journal article supplement (doi:10.1039/c1ra00313e), 2011-01-01
Supplement: c1ra00313e.pdf [file c1ra00313e.pdf]

## Supplementary Information

### **Fluorescent probe for Fe<sup>3+</sup> and CN<sup>-</sup> in aqueous media mimicking a memorized molecular crossword puzzle**

Manoj Kumar,\* Rajesh Kumar, Vandana Bhalla

Department of Chemistry, UGC Sponsored-Center for Advance Studies-1,  
Guru Nanak Dev University  
Amritsar (Pb)-143005, India  
Email: [mksharmaa@yahoo.co.in](mailto:mksharmaa@yahoo.co.in)

| <b>Contents</b>                                                                                      | <b>Page No.</b> |
|------------------------------------------------------------------------------------------------------|-----------------|
| 1. <sup>1</sup> H NMR spectrum of <b>2</b> in CDCl <sub>3</sub> .                                    | S1              |
| 2. <sup>13</sup> C NMR spectrum of <b>2</b> in CDCl <sub>3</sub> .                                   | S2              |
| 3. FAB mass spectrum of <b>2</b> .                                                                   | S3              |
| 4. <sup>1</sup> H NMR spectrum of <b>4</b> in CDCl <sub>3</sub> .                                    | S4              |
| 5. <sup>13</sup> C NMR spectrum of <b>4</b> in CDCl <sub>3</sub> .                                   | S5              |
| 6. FAB mass spectrum of <b>4</b> .                                                                   | S6              |
| 7. Pictorial representation of binding modes of compound <b>4</b> with Fe <sup>3+</sup> ions.        | S7              |
| 8. Selectivity of receptor <b>4</b> for Fe <sup>3+</sup> ion over other metal ions.                  | S8              |
| 9. Job plot for <b>4</b> and Fe <sup>3+</sup> /CN <sup>-</sup> in 10% aqueous ethanol.               | S9              |
| 10. Ratiometric selectivity of compound <b>4</b> towards CN <sup>-</sup> ions over other anions.     | S10             |
| 11. The intermolecular proton transfer between cyanide and N-H group.                                | S11             |
| 12. <sup>1</sup> H NMR spectra of compound <b>4</b> with CN <sup>-</sup> ions in CDCl <sub>3</sub> . | S12             |
| 13. Sequential logic circuit for the second sequence.                                                | S13             |

1.  $^1\text{H}$  NMR spectrum of **2** in  $\text{CDCl}_3$ .

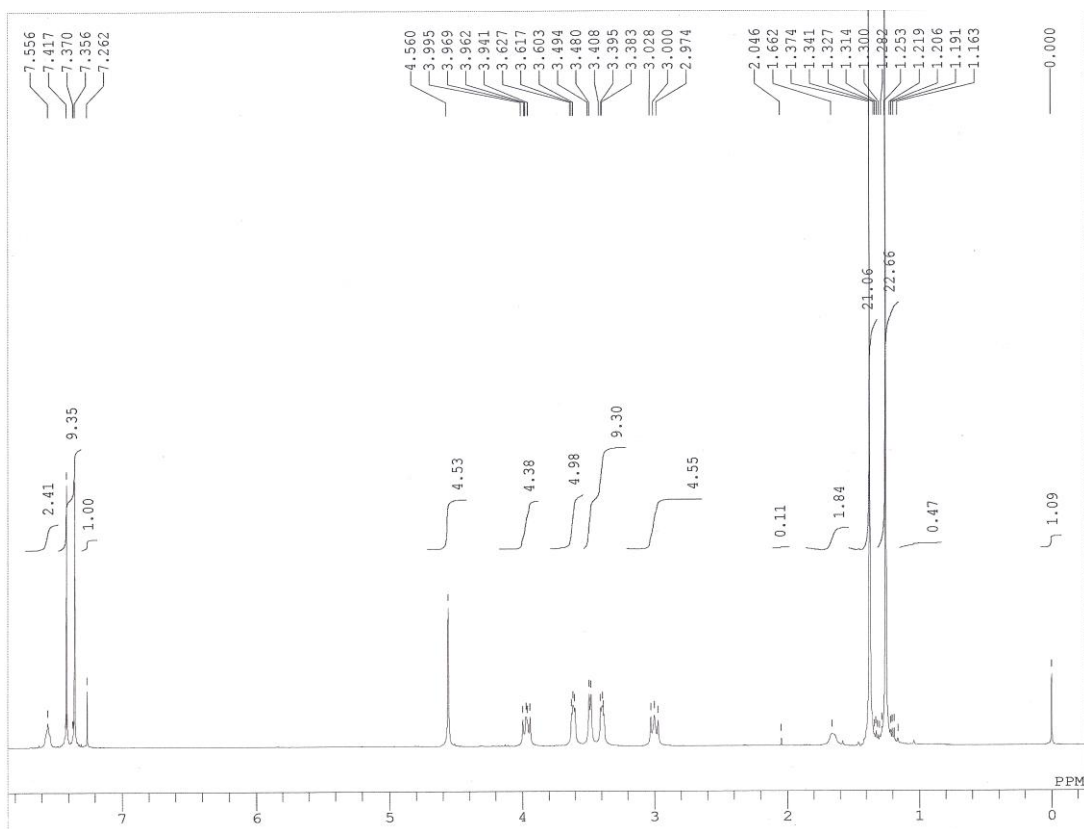

Figure S1.  $^1\text{H}$  NMR spectrum of **2** in  $\text{CDCl}_3$ .

2.  $^{13}\text{C}$  NMR Spectrum of **2** in  $\text{CDCl}_3$ .

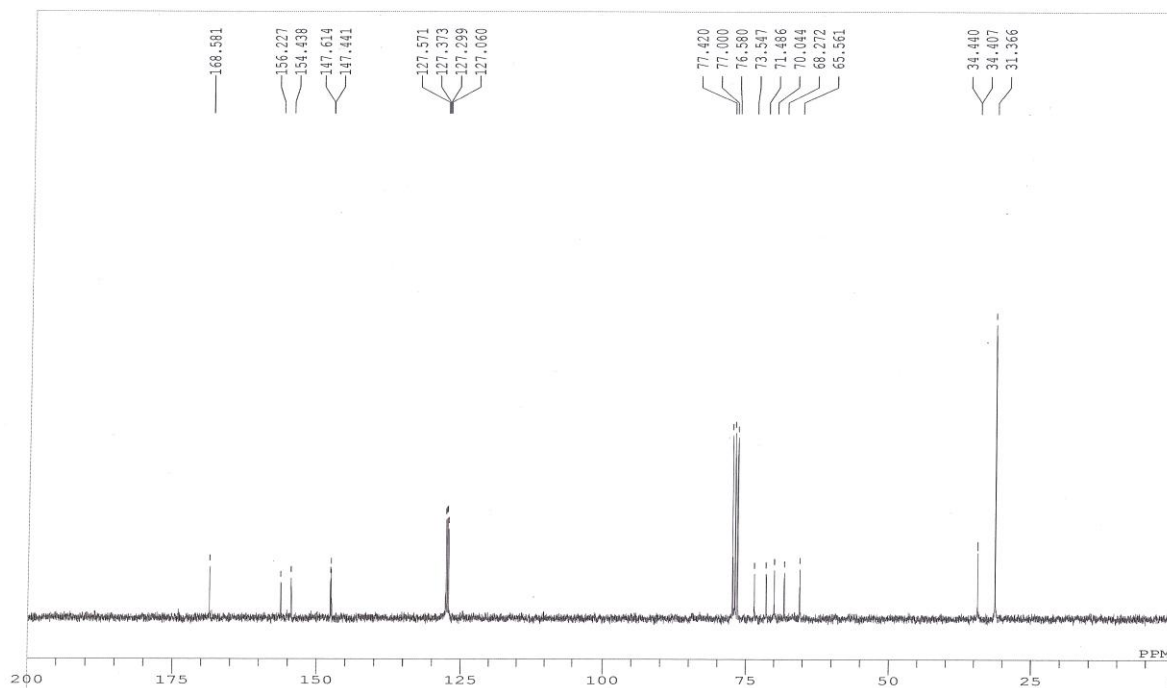

Figure S2.  $^{13}\text{C}$  NMR spectrum of **2** in  $\text{CDCl}_3$ .

### 3. FAB mass spectrum of 2.

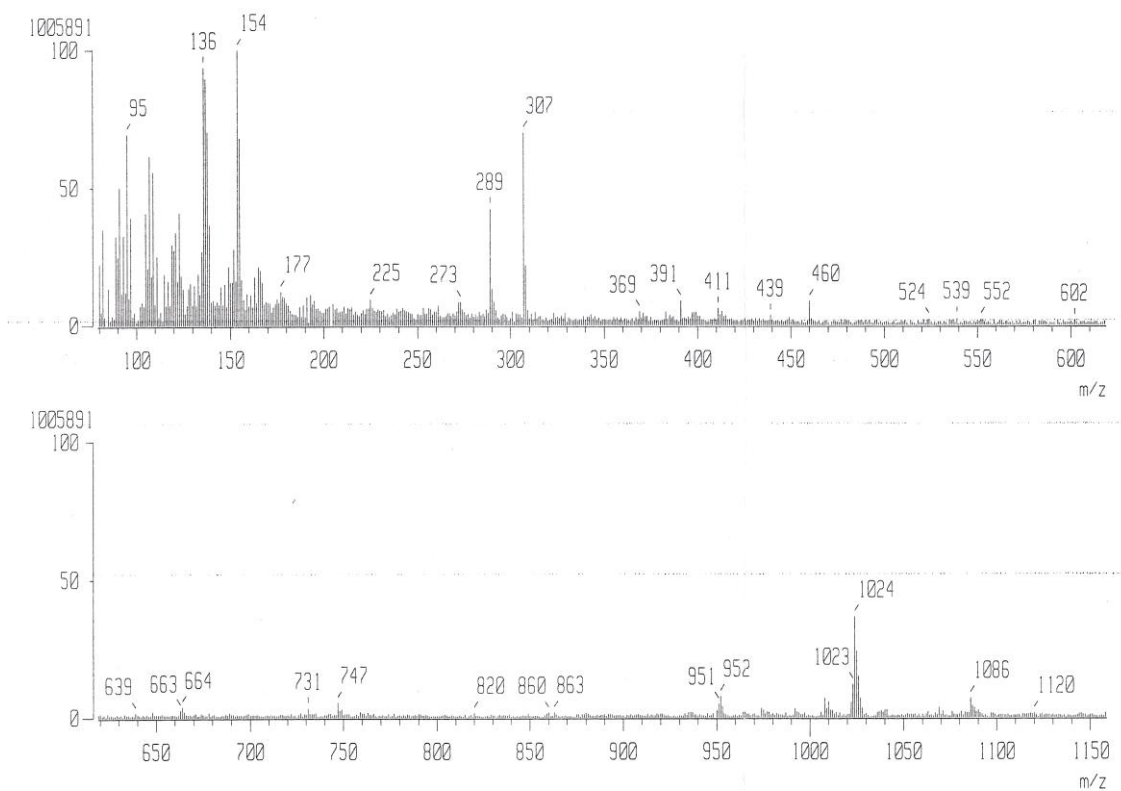

**Figure S3.** FAB mass spectrum of 2.

4.  $^1\text{H}$  NMR spectrum of **4** in  $\text{CDCl}_3$ .

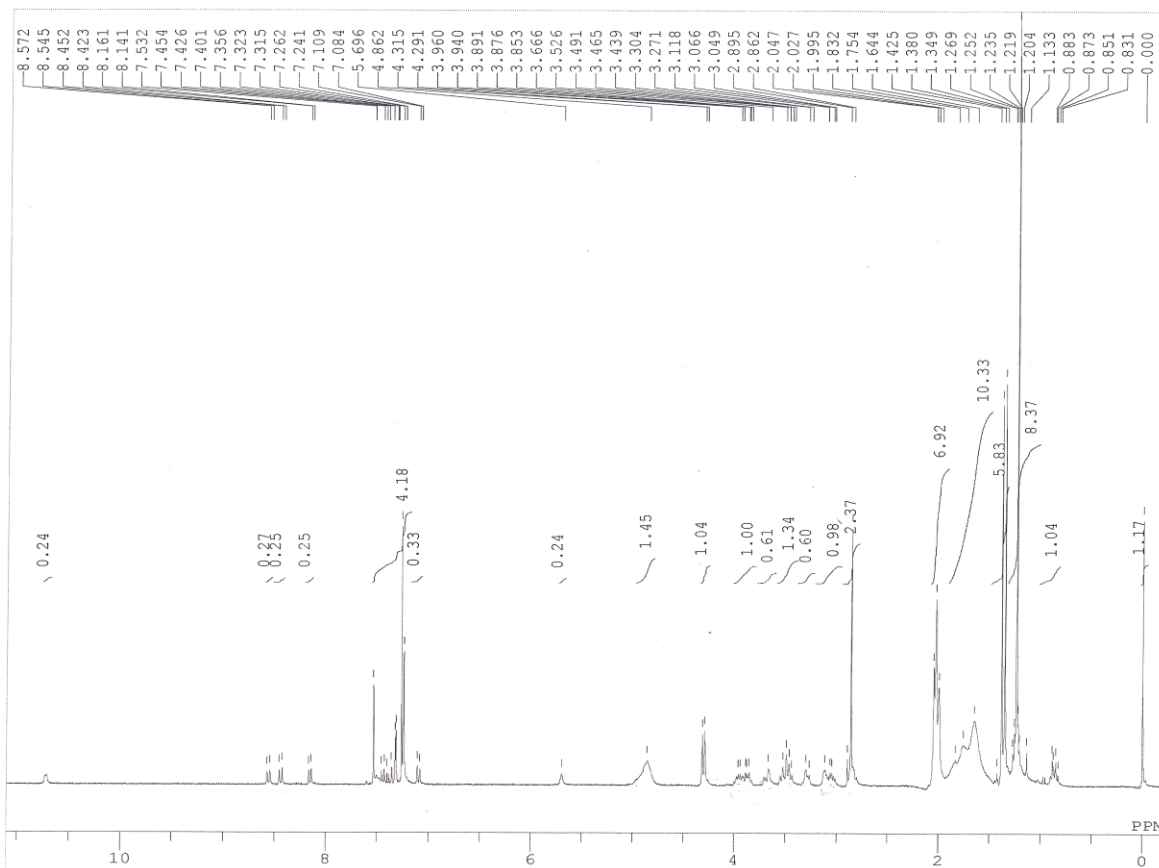

Figure S4.  $^1\text{H}$  NMR spectrum of **4** in  $\text{CDCl}_3$ .

5.  $^{13}\text{C}$  NMR spectrum of **4** in  $\text{CDCl}_3$ .

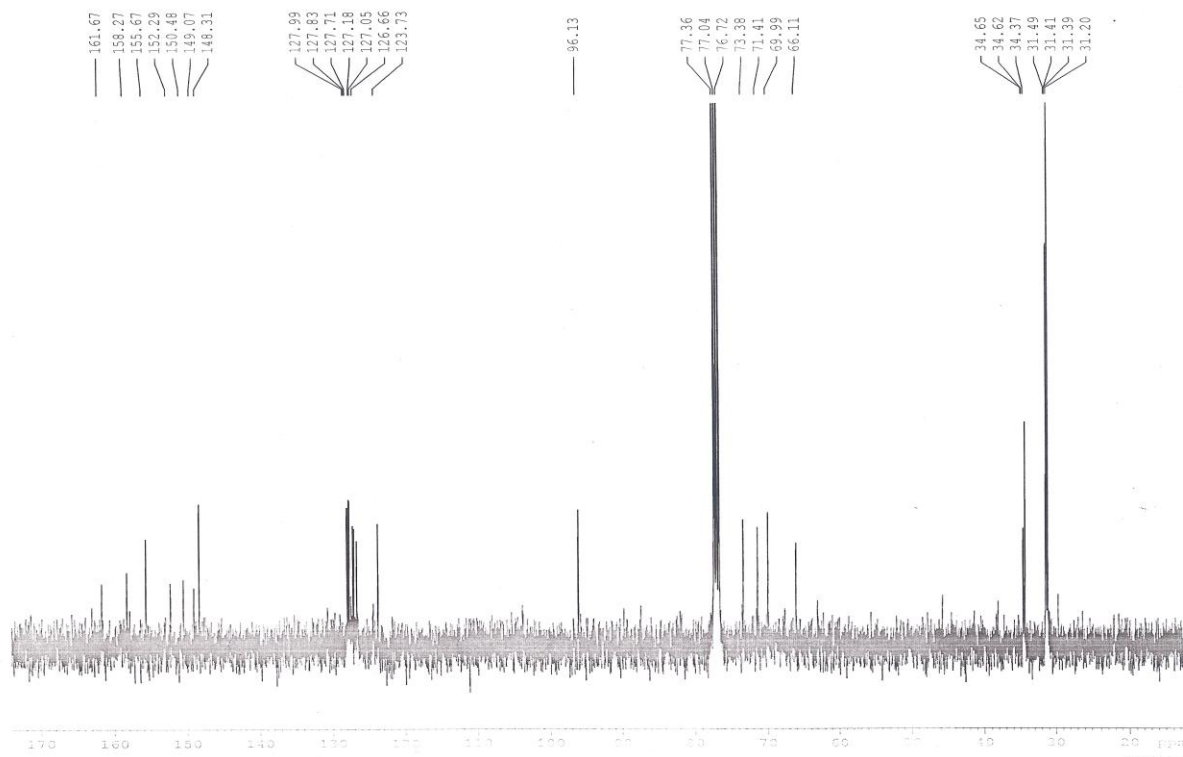

Figure S5.  $^{13}\text{C}$  NMR spectrum of **4** in  $\text{CDCl}_3$ .

## 6. FAB mass spectrum of 4.

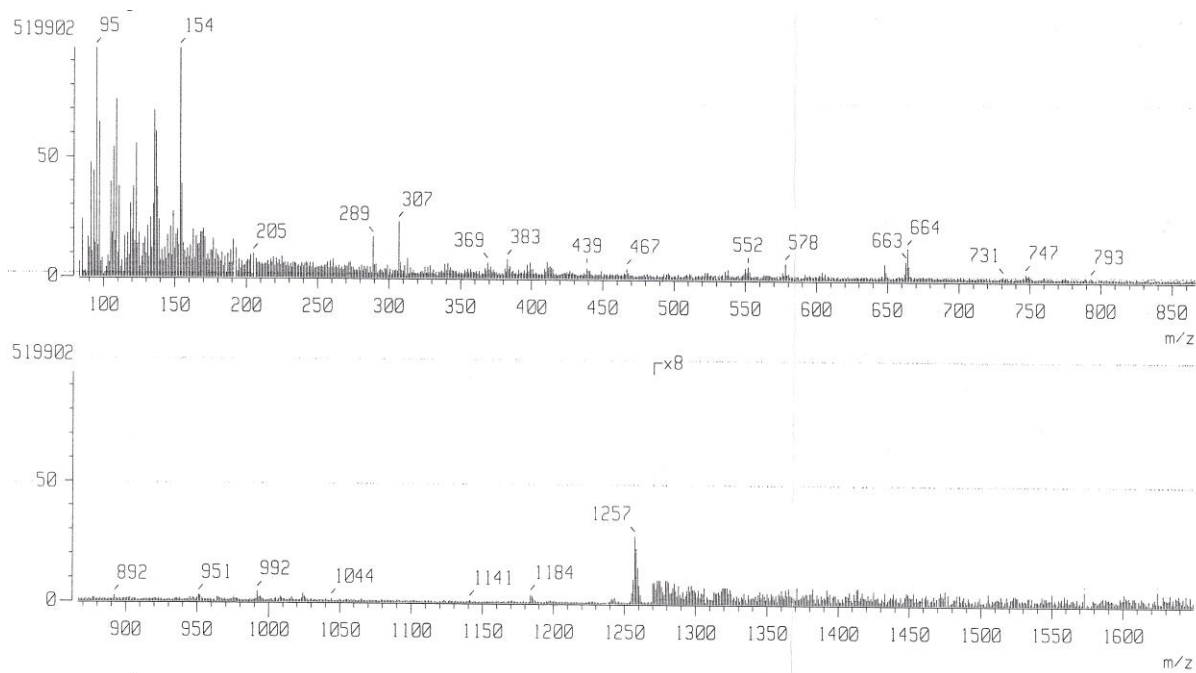

**Figure S6.** FAB mass spectrum of 4.

7. Pictorial representation of binding modes of compound **4** with  $\text{Fe}^{3+}$  ions.

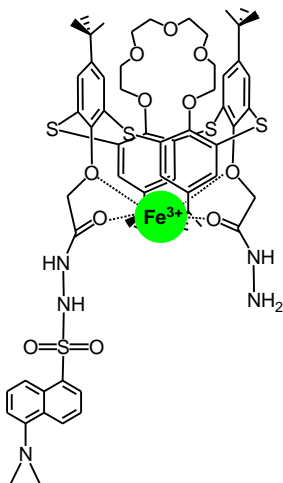

**Figure S7.** Pictorial representation of binding modes of compound **4** with  $\text{Fe}^{3+}$  ions



8. Selectivity of receptor **4** for  $\text{Fe}^{3+}$  ion over other metal ions.

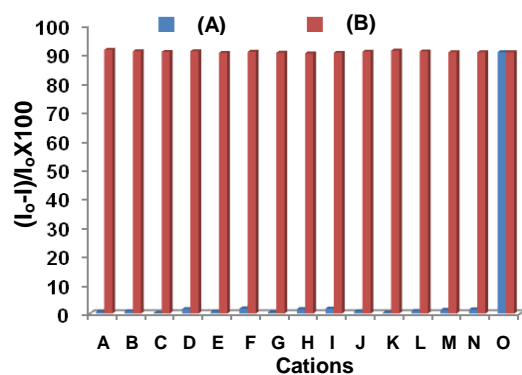

**Figure S8.** (A) Selectivity of **4** ( $5.0 \mu\text{M}$ ) towards  $\text{Fe}^{3+}$  upon addition of different cations and (B) Competitive selectivity of **4** ( $5.0 \mu\text{M}$ ) towards  $\text{Fe}^{3+}$  in the presence of different cations in 10% aqueous ethanol. A =  $\text{Li}^+$ , B =  $\text{Na}^+$ , C =  $\text{K}^+$ , D =  $\text{Ba}^{2+}$ , E =  $\text{Mg}^{2+}$ , F =  $\text{Ni}^{2+}$ , G =  $\text{Cu}^{2+}$ , H =  $\text{Zn}^{2+}$ , I =  $\text{Ag}^+$ , J =  $\text{Cd}^{2+}$ , K =  $\text{Hg}^{2+}$ , L =  $\text{Pb}^{2+}$ , M =  $\text{Co}^{2+}$ , N =  $\text{Fe}^{2+}$ , O =  $\text{Fe}^{3+}$ .

9. Job plot for **3** and  $\text{Fe}^{3+}/\text{CN}^-$  in 10% aqueous ethanol.

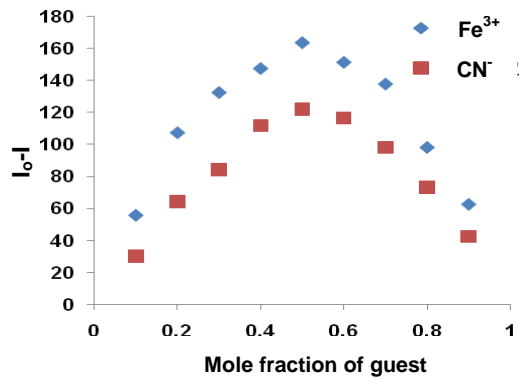

**Figure S9.** Job plot for **4** and guest ( $\text{Fe}^{3+}$  or  $\text{CN}^-$ ) in 10% aqueous ethanol.

10. Ratiometric selectivity of compound **4** towards  $\text{CN}^-$  ions over other anions.

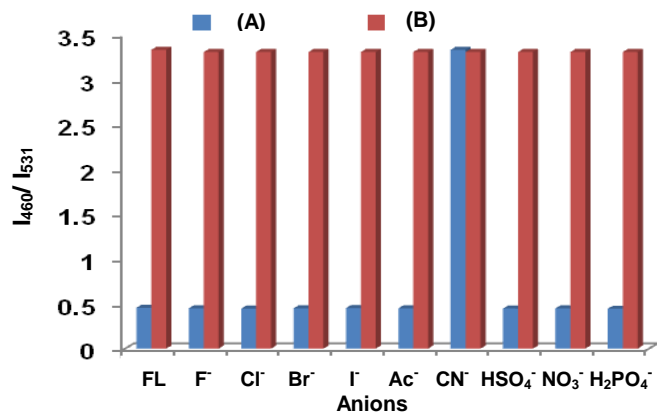

**Figure S10.** (A) Ratiometric selectivity of **4** (5.0  $\mu\text{M}$ ) towards  $\text{CN}^-$  upon addition of different anions and (B) Competitive selectivity of **4** (5.0  $\mu\text{M}$ ) towards  $\text{CN}^-$  in the presence of different anions in 10% aqueous ethanol

**11.** The intermolecular proton transfer between cyanide and N-H group of sulphonamide group of thiacalix[4]podand **4**.

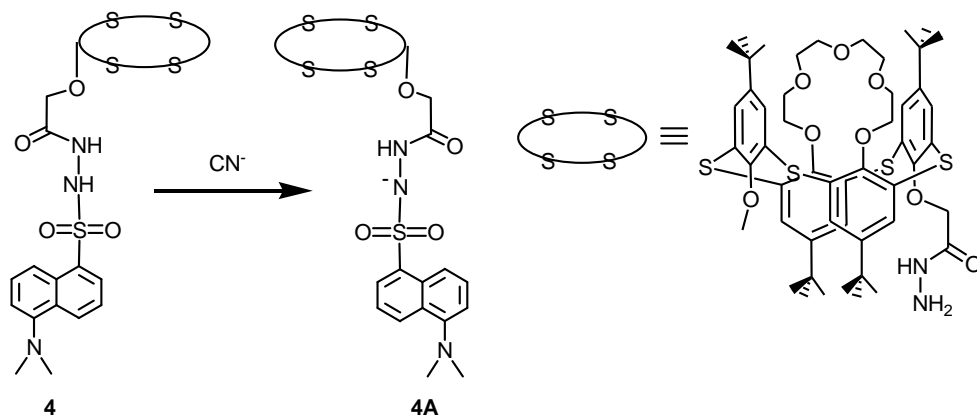

**Scheme S1.** The intermolecular proton transfer between cyanide and N-H group of sulphonamide group of thiacalix[4]podand **4**.

12.  $^1\text{H}$  NMR spectra of compound **4** with  $\text{CN}^-$  ions in  $\text{CDCl}_3$ .

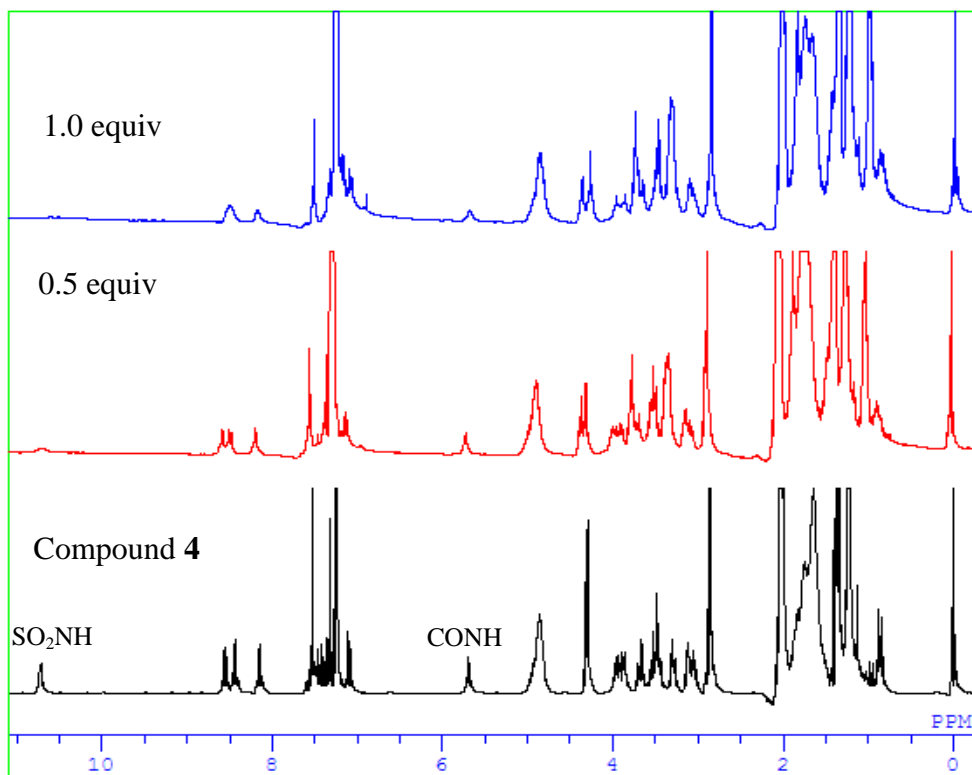

**Figure S11.**  $^1\text{H}$  NMR spectra of compound **4** with  $\text{CN}^-$  ions in  $\text{CDCl}_3$ .

**13.** Sequential logic circuit for the second sequence with two input strings *InC* and *InF* at  $\lambda$  460 nm and 531 nm.

(A)

| Entry | <i>In C</i><br>(CN <sup>-</sup> ) | <i>In F</i><br>(Fe <sup>3+</sup> ) | Output 1<br>( $\lambda$ 460 nm) | Output 2<br>( $\lambda$ 531 nm) |
|-------|-----------------------------------|------------------------------------|---------------------------------|---------------------------------|
| 1     | 0                                 | 0                                  | 0                               | 1                               |
| 2     | 1                                 | 0                                  | 1                               | 0                               |
| 3     | 0                                 | 1                                  | 0                               | 0                               |
| 4     | 1                                 | 1                                  | 0                               | 0                               |

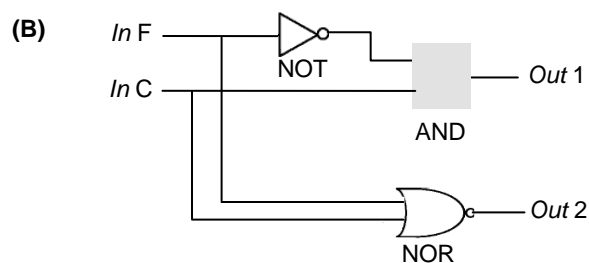

**Figure S12.** (A) Truth table for the second sequence (addition of first input *InC* followed by second input *InF*) of molecular crossword puzzle; (B) Sequential logic circuit for the second sequence with two input strings *InC* and *InF* at  $\lambda$  460 nm and 531 nm.
